# Supplementary material for: Interstitial chromosomal deletion of the tuberous sclerosis complex 2 locus is a signature for radiation‐associated renal tumors in Eker rats
Source: PubMed Central journal article supplement — Cancer Sci. 2020 Feb 3;111(3):840–8. doi: 10.1111/cas.14307 (PMC7060461; doi:10.1111/cas.14307), 2020-02-03
Supplement: CAS-111-840-s001.pdf [file CAS-111-840-s001.pdf]

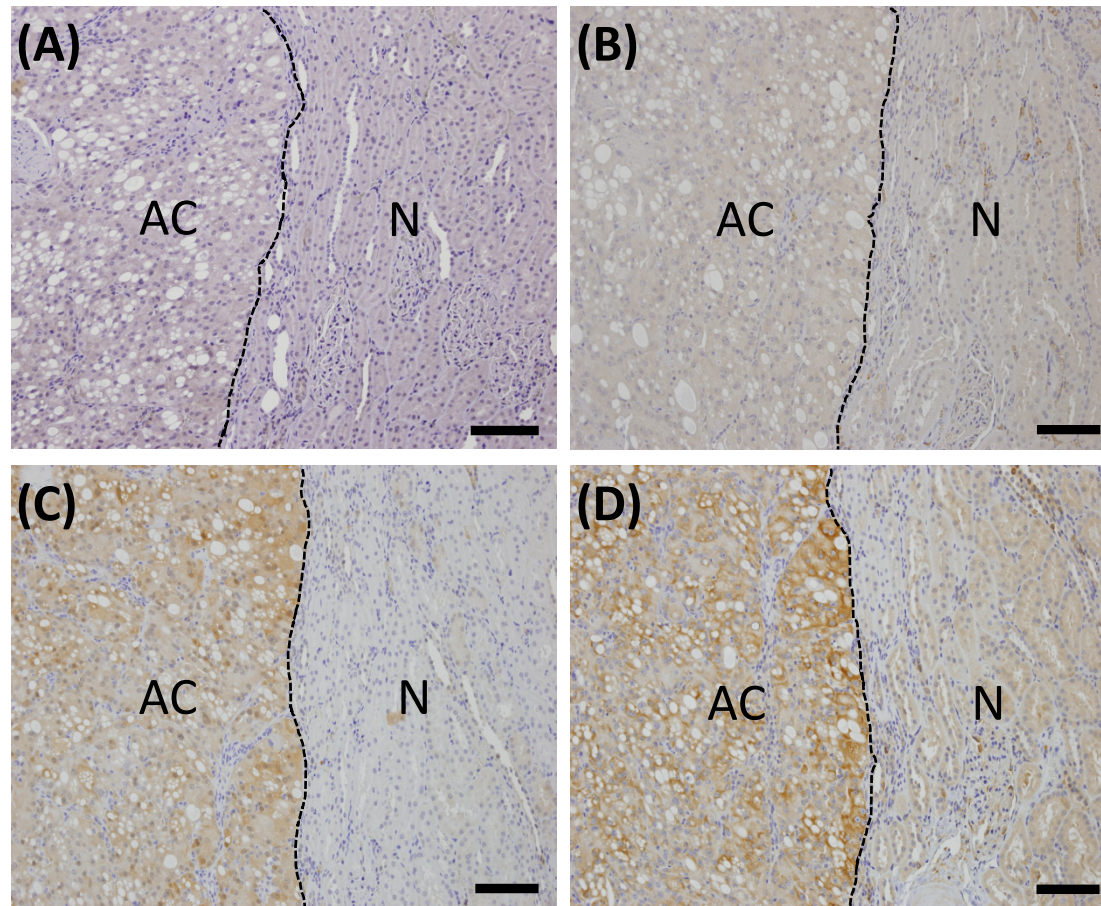

**Figure S1.** Immunohistochemical detection of mTOR pathway activation in radiation-associated renal tumors of *Tsc2*<sup>+/-</sup> F1 rats. Shown are representative immunostained images of phospho-Akt1 (Ser473) (A), phospho-mTOR (Ser2448) (B), phospho-4E-BP1 (Thr37/46) (C), and phospho-S6 ribosomal protein kinase (Ser235/236) (D) in renal adenocarcinomas of gamma-irradiated F1 rats. AC, adenocarcinoma; N, normal tissue. Scale bars, 100 μm.
